# Supplementary material
Source: publisher site journal article supplement (https://en-cdn.bio-protocol.org/attached/file/20200220/3549%20Appendix%201.docx)

**Appendix 1**

FIRST STAGE

DATE: RAT NUMBER:

#DAY OF THE EXPERIMENT
# DAY IN STAGE 1:


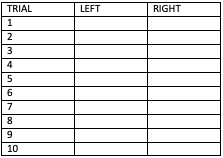

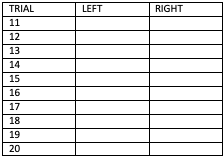


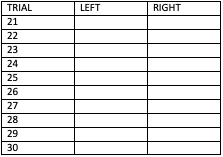


SECOND STAGE

DATE: RAT NUMBER:

#DAY OF THE EXPERIMENT:
# DAY IN STAGE 2:


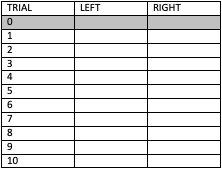


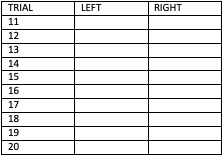


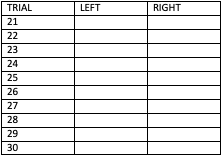


THIRD STAGE

DATE: RAT NUMBER:

#DAY OF THE EXPERIMENT:
# DAY IN STAGE 3:

Delay type: Delay type:


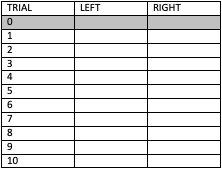

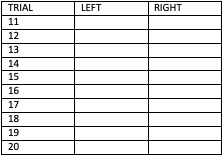


Delay type:


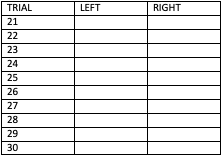

Supplement: Supplementary file 1 [file 3549%20Appendix%201.docx]
